# Supplementary material for: Predicting Sensationalism in Suicide Story Headlines
Source: Atypon-hosted journal article supplement (doi:10.1027/0227-5910/a000943), 2024-02-06
Supplement: 0227-5910_a000943_esm1.pdf [file 0227-5910_a000943_esm1.pdf]

## Electronic Supplementary Material 1 (ESM 1)

### Media Reporting of Suicide Codebook

| Recommendation                                                       | Operationalization                                                                                                                                                                               | Label                                                                                                                                                |
|----------------------------------------------------------------------|--------------------------------------------------------------------------------------------------------------------------------------------------------------------------------------------------|------------------------------------------------------------------------------------------------------------------------------------------------------|
| Avoid sensationalizing details in the headline                       | The inclusion of language that is offensive, exploitive, and insensitive to grieving loved ones.                                                                                                 | 0 (sensitive to loved ones)<br>1 (some insensitivity)<br>2 (disregard to sensitivity)<br>3 (grossly insensitive)                                     |
| Avoid sensationalizing details in the story                          | The inclusion of language that is offensive, exploitive, and insensitive to grieving loved ones.                                                                                                 | 0 (sensitive to loved ones)<br>1 (some insensitivity)<br>2 (disregard to sensitivity)<br>3 (grossly insensitive)                                     |
| Avoid describing or depicting the method and location of the suicide | Either method or location mentioned; Location includes building, specific locations/physical environments                                                                                        | 0 (neither mentioned)<br>1 (method)<br>2 (location)<br>3 (method and location)                                                                       |
| Avoid sharing the content of a suicide note                          | Containing any information from the suicide note                                                                                                                                                 | 0 (no)<br>1 (yes)                                                                                                                                    |
| Avoid prominent placement of stories about suicide deaths            | Number of words listed in article                                                                                                                                                                | word count                                                                                                                                           |
| Minimize describing personal details about the person who died       | Characteristics, traits, personality, family (when the family is an object or detail of person's life), professional accomplishments, reasons for notoriety, personal history (childhood, etc.). | 1 (some description of person beyond death)<br>2 (moderate description of person beyond death)<br>3 (substantial description of person beyond death) |

|                                                                                                 |                                                                                                                                                                          |                                                                                                                                                                                           |
|-------------------------------------------------------------------------------------------------|--------------------------------------------------------------------------------------------------------------------------------------------------------------------------|-------------------------------------------------------------------------------------------------------------------------------------------------------------------------------------------|
| Avoid presenting suicide as a common or acceptable response to hardship                         | Acceptable, normal, reasonable, justified response to a circumstance.                                                                                                    | 0 (no mention of characterization)<br>1 (action is somewhat acceptable/normalized)<br>2 (action is moderately acceptable/normalized)<br>3 (action is substantially acceptable/normalized) |
| Avoid oversimplifying or speculating on the reason for the suicide                              | Number of times the article lists reasons for suicide                                                                                                                    | Number of reasons                                                                                                                                                                         |
| Avoid glamorizing or romanticizing suicide                                                      | Inclusion of language that equates the act of suicide as part of the celebrity (artist, troubled, creative mind, etc.) or high-profile lifestyle.                        | 0 (no glamorizing)<br>1 (some glamorizing)<br>2 (overt glamorization)                                                                                                                     |
| Avoid overstating the problem of suicide by using descriptors like “epidemic” or “skyrocketing” | Use of words not grounded by current research and eliciting panic/worry/anxiety.                                                                                         | Number of times words (epidemic, skyrocketing, pandemic) used                                                                                                                             |
| Report suicide as a public health issue, include stories of hope, healing, recovery             | Incorporation of recovery story; adaptive responses to adverse circumstances                                                                                             | 0 (no inclusion) to -x (each unique story or policy change is -1)                                                                                                                         |
| Include mental health resources                                                                 | Inclusion of Suicide hotline, websites for support, list of mental health professionals or community help                                                                | 0 (no)<br>-1 (yes)                                                                                                                                                                        |
| Use appropriate language                                                                        | Appropriate language: “died by suicide,” “completed suicide,” “killed himself/herself” Inappropriate language: “unsuccessful”, “failed attempt” “successful” “committed” | -x (number of appropriate language terms used) to x (number of inappropriate language terms used)                                                                                         |

---
