# Supplementary material for: Predicting Sensationalism in Suicide Story Headlines
Source: Atypon-hosted journal article supplement (doi:10.1027/0227-5910/a000943), 2024-02-06
Supplement: 0227-5910_a000943_esm2.pdf [file 0227-5910_a000943_esm2.pdf]

## Electronic Supplementary Material 2 (ESM 2)

### List of Article Headlines

---

|                  |                                                                                                                                                                                                                                                                                                                                                                                                                                                                                                                                                                                                                                                                            |
|------------------|----------------------------------------------------------------------------------------------------------------------------------------------------------------------------------------------------------------------------------------------------------------------------------------------------------------------------------------------------------------------------------------------------------------------------------------------------------------------------------------------------------------------------------------------------------------------------------------------------------------------------------------------------------------------------|
| Robin Williams   | Robin Williams: The man beyond the screen<br>Why Robin Williams lost to depression<br>Read Questlove's Heartwarming Story About Robin Williams & The Roots<br>Hagel Praises Williams as 'True Friend' of Troops<br>Nanu Nanu, Mork<br>Stories from Slate<br>Depression knows no socioeconomic, cultural boundaries<br>Va. man on 10,000-mile run for suicide prevention<br>Robin Williams will be Dearly Missed                                                                                                                                                                                                                                                            |
| Anthony Bourdain | Bill Title: Calls on Division of Travel and Tourism to establish "Anthony Bourdain Food Trail" in New Jersey<br>Inside Anthony Bourdain's globe-trotting career<br>Anthony Bourdain helped a kid fighting leukemia make his dream trip to find the world's best seafood<br>Wooden: Anthony Bourdain and America<br>Anthony Bourdain remembered by food community<br>Recent celebrity suicides outline room to improve mental health dialogue<br>He was my love, my rock, my protector': Asia Argento posts heartfelt tribute to her partner Anthony Bourdain<br>The risk of 'contagion' after suicides is real<br>New Details About Anthony Bourdain's Last Days and Death |
| Kate Spade       | Kate Spade, fashion designer, found dead in apparent suicide<br>David Spade's rough week<br>After a shattering week, a search for the light<br>Celebrity suicides highlight troubling trend in midlife<br>EDITORIAL: The Lifeline number: 1-800-273-TALK (8255)<br>Suicide rates increase in Indiana, nationwide<br>Manner of news reporting can raise suicide risk<br>Millennial Monday: Let's Talk About Mental Health<br>OPINION: We need to talk about it - suicide                                                                                                                                                                                                    |
| Leelah Alcorn    | A letter to Leelah                                                                                                                                                                                                                                                                                                                                                                                                                                                                                                                                                                                                                                                         |

- An Ohio transgender teen's suicide, a mother's anguish  
Leelah Alcorn: A Death That Means Something  
OH: Transgender Teen's Suicide Sparks Outrage  
Ohio parents' beliefs cost daughter her life  
Stories from Slate  
The transgender life: What to know, say and understand  
Transgender teen's death calls for action  
Washington: Anti-LGBT Pundit: Leelah Alcorn Probably Possessed By Demons, LGBT Community To Blame For Suicide
- Ariel Castro  
Ariel Castro's Berks relatives not surprised by 'cowardly' exit  
Cleveland kidnapper Ariel Castro dead: commits suicide in prison  
Ariel Castro's lawyer says suicide not 'happy ending' as victims remain silent  
Cleveland Kidnapper Ariel Castro Found Dead in Prison  
Cleveland man's suicide brings little sympathy  
Ohio prison director orders review of Ariel Castro's suicide  
Ohio prison suicides not limited to mentally ill  
URGENT - ariel castro death  
Volunteers at Ohioan's home after captor's suicide
- Chester Bennington  
The Words, Sound & Legacy of Chester Bennington  
Linkin Park cancels tour following Chester Bennington's death  
Record label: Chester Bennington's funeral held days ago  
Blink-182 & Linkin Park's 'Blinkin Park' Tour Dates Canceled After Chester Bennington's Death  
Jared Leto's tribute to Chester Bennington  
Travis Barker Shares One of His 'Favorite Memories' With Chester Bennington: Rocking Out in the Philippines  
Linkin Park's Recordings Are Lighting Up the Midweek U.K. Charts  
Linkin Park thank Chris Martin for 'beautiful' rendition of Crawling  
Linkin Park cancels tour after frontman's death
- Mindy McCready  
Autopsy confirms Mindy McCready's death as suicide  
News briefs from around Tennessee at 1:58 a.m. EST; Monday, February 18, 2013  
Country Star Mindy McCready Dead From Apparent Suicide  
McCready's death highlights guns in suicides: Your Say  
Mindy McCready 1975 - 2013

Mindy McCready's funeral held in southwest Florida  
Old friends turn out for Mindy McCready memorial  
Mindy McCready's funeral held in southwest Florida  
Mindy McCready's funeral set for Tuesday in Fla.

Aaron Hernandez

Aaron Hernandez's murder conviction cleared after suicide  
Aaron Hernandez was a troubled man, not a monster  
Hernandez's body brought to Connecticut funeral home  
Funeral held for ex-NFL player Aaron Hernandez  
Aaron Hernandez's life in prison: Fights, blocked doors, and a metal shiv  
Opinion: Aaron Hernandez could never escape the demons of his past  
Aaron Hernandez's brain to be studied at BU CTE Center  
Ex-NFL star Aaron Hernandez hangs himself in his prison cell  
The rise and fall of Aaron Hernandez

Chris Cornell

Chris Cornell ended the last performance of his life with a song about death  
Chris Cornell's Biggest Billboard Chart Hits  
Chris Cornell's wife disputes 'intentional' suicide finding  
Chris Cornell's Wife Questions Cause of Death, Says Loss Has Created 'Emptiness in My Heart'  
Chris Cornell's wife, lawyer say Ativan use may have contributed to his death  
Details Emerge About Final Moments of Chris Cornell's Life: Report  
Recent Tweets From Chris Cornell Full of Optimism, Hope, Love  
Singer Chris Cornell hanged himself, medical examiner says  
Tom Morello, Serj Tankian, Trent Reznor and Others Recall Final Interactions With Chris Cornell

---
